# Supplementary material for: Ten Years of Experience Support Pharmacogenetic Testing to Guide Individualized Drug Therapy
Source: MDPI journal article supplement (doi:10.3390/pharmaceutics14010160), 2022-01-11
Supplement: s1 [file s1]

## Supplementary Materials

### Ten Years of Experience Support Pharmacogenetic Testing to Guide Individualized Drug Therapy

María Celsa Peña-Martín, Belén García-Berrocal, Almudena Sánchez-Martín, Elena Marcos-Vadillo, María Jesús García-Salgado, Santiago Sánchez, Carolina Lorenzo, David González-Parra, Francisco Sans, Manuel Franco, Andrea Gaedigk, María José Mateos-Sexmero, Catalina Sanz and María Isidoro-García

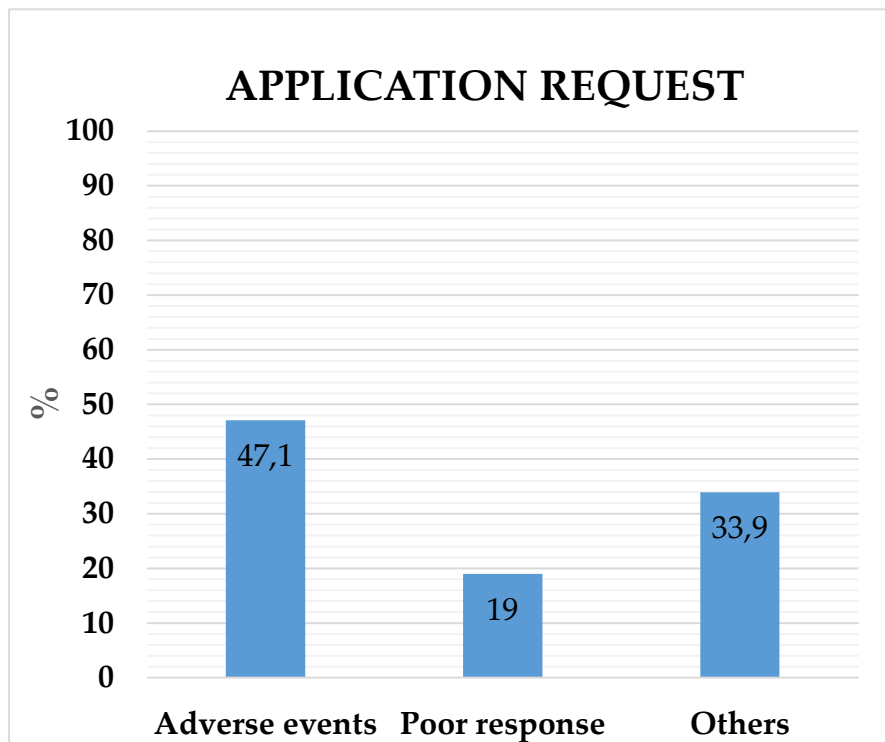

Figure S1. Reasons for genetic analysis and clinical services.

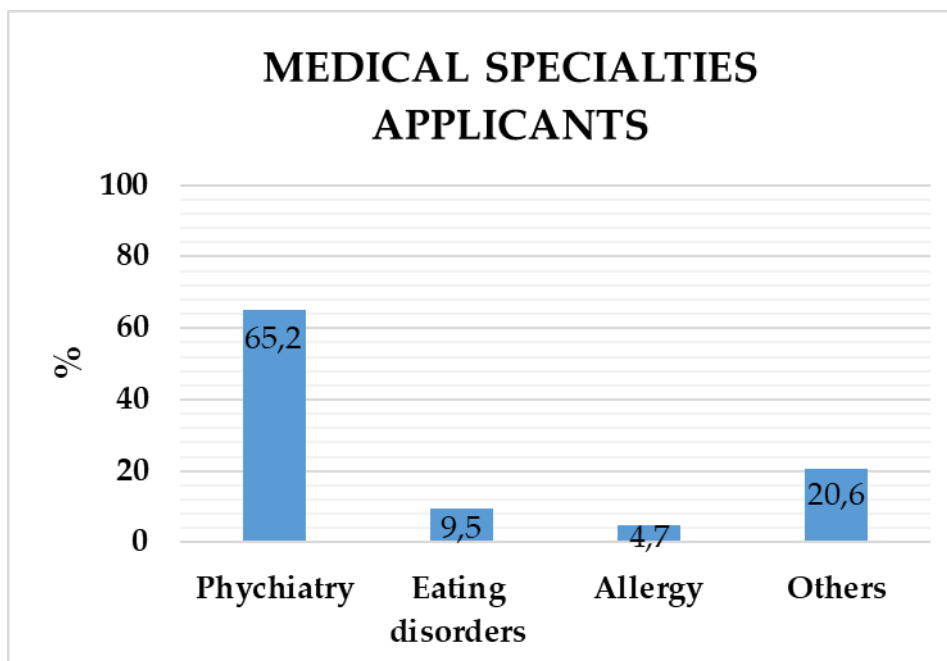

**Figure S2.** Main medical specialties applicants.

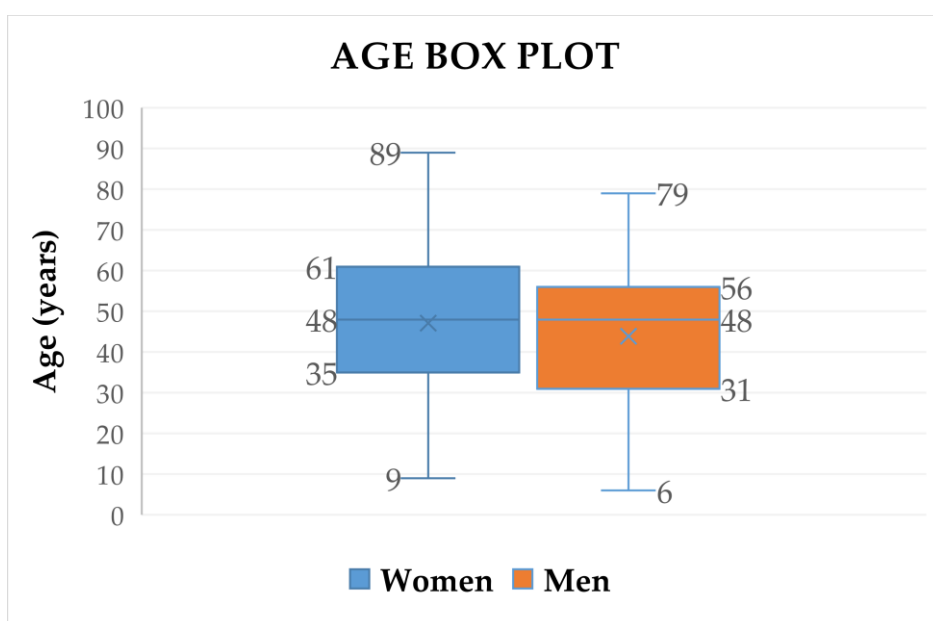

**Figure S3.** Age blox plot distribution in women and men.

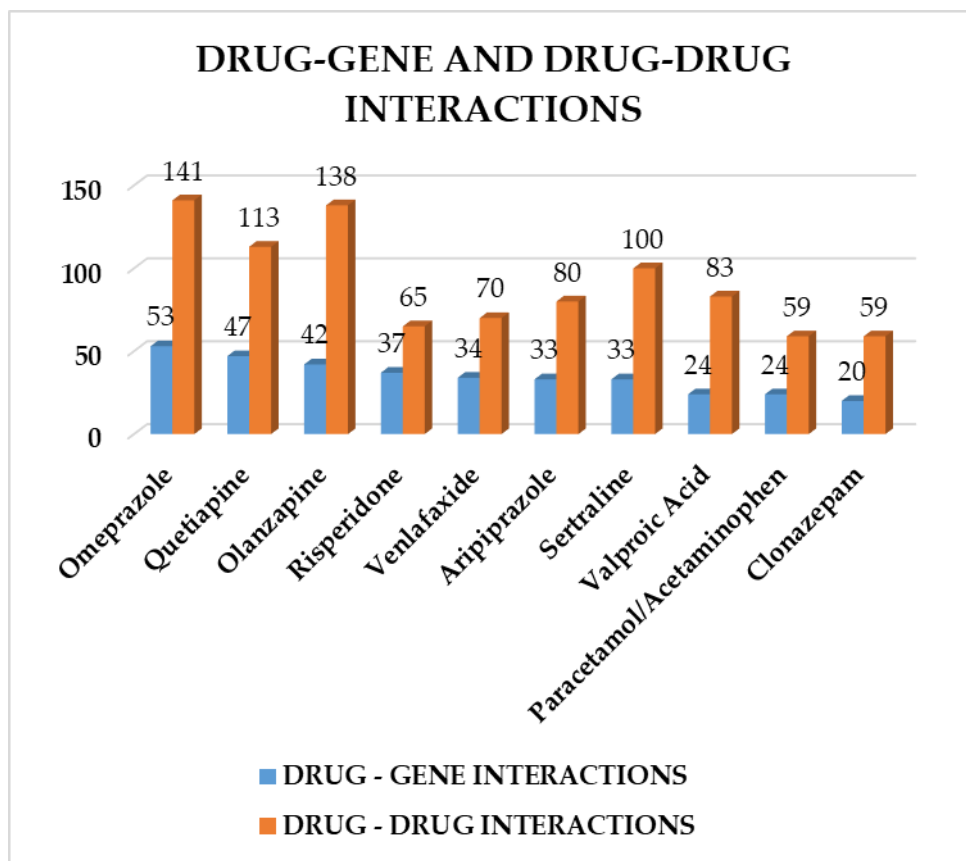

**Figure S4.** Top 10 Drug-gene and drug-drug interactions.
